# Supplementary material for: “Corp-Osa-Mente”, a Combined Psychosocial–Neuropsychological Intervention for Adolescents and Young Adults with Fragile X Syndrome: An Explorative Study
Source: MDPI journal article supplement (doi:10.3390/brainsci13020277), 2023-02-07
Supplement: s1 [file s1]

## THE SURVEY

Please respond to the following questions by placing a check mark (✓) in the answer box that corresponds to your response and/or fill in the blank where indicated. Answers are anonymous.

**The compiler is:**

- ☐ Female participant to the project
- ☐ Male participant to the project
- ☐ Father
- ☐ Mother
- ☐ other family member. Please specify:
- ☐ A professional working with the participant (e.g., Educator). Please specify:

**Is the participant for whom you are answering/ are you carrying out any other treatments? If yes, which ones?**

- ☐ Pharmacological
- ☐ Psycho-educational with non-psychologist educator
- ☐ Psycho-educational with another psychologist
- ☐ Other. Please specify:

**Are you, on average, satisfied with the project?**

- ☐ Yes
- ☐ No

**Areas of improvement. You can choose more than one answer.**

- ☐ Autonomy in the home environment (e.g. preparing meals alone)
- ☐ Autonomy in the social environment (e.g. going out with friends)
- ☐ Autonomies in the work environment (e.g. organising one's own work)
- ☐ Autonomies at school (e.g. greater management of study materials)
- ☐ Receptive language skills (e.g. greater ability to understand others)
- ☐ Expressive language skills (e.g. improved speech, expanded vocabulary)
- ☐ Reading-writing skills
- ☐ Attention, memory and executive functions (e.g. increased attentional skills, increased ability to remember and plan commitments)
- ☐ Behaviour management (e.g. anger outbursts)
- ☐ Emotion management (e.g. anxiety, fear, sadness)
- ☐ Ability to communicate one's emotional states
- ☐ Other. Please specify:

**Areas of null-effects. You can choose more than one answer.**

- ☐ Autonomy in the home environment (e.g. preparing meals alone)
- ☐ Autonomy in the social environment (e.g. going out with friends)
- ☐ Autonomies in the work environment (e.g. organising one's own work)
- ☐ Autonomies at school (e.g. greater management of study materials)
- ☐ Receptive language skills (e.g. greater ability to understand others)
- ☐ Expressive language skills (e.g. improved speech, expanded vocabulary)
- ☐ Reading-writing skills
- ☐ Attention, memory and executive functions (e.g. increased attentional skills, increased ability to remember and plan commitments)
- ☐ Behaviour management (e.g. anger outbursts)
- ☐ Emotion management (e.g. anxiety, fear, sadness)
- ☐ Ability to communicate one's emotional states
- ☐ Other. Please specify:

**Which aspect(s) do you like the most about the intervention? You can choose more than one answer.**

- ☐ On-person meetings
- ☐ Online meetings
- ☐ The possibility of having a WhatsApp group to interact in
- ☐ The relationship with the psychologist
- ☐ Homework between meetings
- ☐ Parenting meetings
- ☐ Other. Please specify:

**Which aspect(s) do you like the least about the intervention? You can choose more than one answer.**

- ☐ On-person meetings
- ☐ Online meetings
- ☐ The possibility of having a WhatsApp group to interact in
- ☐ The relationship with the psychologist
- ☐ Homework between meetings
- ☐ Parenting meetings
- ☐ Other. Please specify:

**Which techniques do you find the most effective?**

- ☐ Psychoeducation

- ☐ Mindfulness
- ☐ Cognitive techniques (ABC method)
- ☐ Neuropsychological techniques (cognitive training)
- ☐ Behavioral techniques
- ☐ Counselling
- ☐ Time management
- ☐ Leisure activities
- ☐ Occupational therapy
- ☐ Sexual education

**Family members only. Since when the participant is in the project (you can choose more than one answer):**

- ☐ I can interact more easily with her/him
- ☐ I can understand his/ her emotions more easily
- ☐ I feel less "stressed"
- ☐ All of the above
- ☐ None of the above
- ☐ Other personal ideas about the impact the project is having on you as a parent: \_\_\_\_\_

**Educators only. Since the project started (you can choose more than one answer):**

- ☐ I know that I can interact with an expert in case of difficulties with the individual with FXS
- ☐ I can more easily understand the emotions of the individual with FXS
- ☐ I have a clearer idea of FXS
- ☐ All of the above
- ☐ None of the above
- ☐ Other. Please specify: \_\_\_\_\_

**Some suggestions:**

---



---



---
